# Zeste maintains repression of *Ubx* transgenes: support for a new model of Polycomb repression

Man-Wook Hur<sup>1</sup>, Jeffrey D. Laney<sup>2</sup>, Sang-Hack Jeon<sup>3</sup>, Janann Ali<sup>4</sup> and Mark D. Biggin<sup>5,\*</sup>

<sup>1</sup>Department of Biochemistry and Molecular Biology, Yonsei University School of Medicine, 134 ShinChon-Dong, SeoDaeMoon-Ku, Seoul, Korea 120-752

<sup>2</sup>Department of Molecular Biophysics and Biochemistry, Yale University, New Haven, CT 06520, USA

<sup>3</sup>Department of Biology, Kon-Kuk University, Seoul, Korea 143-701

<sup>4</sup>Department of Biological Chemistry and Molecular Pharmacology, Harvard Medical School, 240 Longwood Avenue, Boston, MA 02115, USA

<sup>5</sup>Genome Sciences Department, Lawrence Berkeley National Laboratory, 1 Cyclotron Road, Mail stop 84-171, Berkeley, CA 94720, USA

\*Author for correspondence (e-mail: mdbiggin@lbl.gov)

Accepted 17 December 2001

## SUMMARY

During late embryogenesis, the expression domains of homeotic genes are maintained by two groups of ubiquitously expressed regulators: the Polycomb repressors and the Trithorax activators. It is not known how the activities of the two maintenance systems are initially targeted to the correct genes. Zeste and GAGA are sequence-specific DNA-binding proteins previously shown to be Trithorax group activators of the homeotic gene *Ultrabithorax* (*Ubx*). We demonstrate that Zeste and GAGA DNA-binding sites at the proximal promoter are also required to maintain, but not to initiate, repression of *Ubx*.

Furthermore, the repression mediated by Zeste DNA-binding site is abolished in *zeste* null embryos. These data imply that Zeste and probably GAGA mediate Polycomb repression. We present a model in which the dual transcriptional activities of Zeste and GAGA are an essential component of the mechanism that chooses which maintenance system is to be targeted to a given promoter.

Key words: Polycomb group, Trithorax group, Homeotic, Zeste, GAGA, *Drosophila*

## INTRODUCTION

The mRNA expression patterns of the Hox or homeotic genes in *Drosophila* are initiated by spatially restricted activators and repressors that are transiently expressed in pregastrula embryos. As the expression of these early regulators decays, the transcription patterns of the homeotic genes are maintained by two complementary sets of regulators that are expressed in all cells: the Polycomb Group (PcG) repressors and the Trithorax Group (trxG) activators (Kennison, 1995; Pirrotta, 1998; Tillib et al., 1999).

The PcG are a coherent set of genes whose sole function is to maintain repression of homeotic and other developmental control genes. Repression is maintained only in those cells in which transcription has not been activated in the pregastrula embryo. PcG repression has been likened to form of a molecular memory because the PcG proteins must continuously mark those genes that are initially repressed in the early embryo (Bienz and Muller, 1995; Cavalli and Paro, 1999; Pirrotta, 1998). The mark on the gene must be continuous as there are no spatially restricted regulators in older embryos that can reinitiate the correct pattern of homeotic expression. PcG proteins are physically associated with their target genes, suggesting that they form a stable

structure that is propagated through multiple rounds of cell division (Sinclair et al., 1998; Strutt and Paro, 1997). The Polycomb system is conserved in most animals, including mammals, and is important for maintaining the determined state of cells (Hashimoto et al., 1998; Strouboulis et al., 1999).

The trxG are ubiquitously expressed activators of one or more of the homeotic genes and are not as homogenous as the Polycomb group (Kennison, 1995; Tillib et al., 1999). By definition, the trxG are distinct from the spatially restricted activators that initiate the early patterns of homeotic transcription. However, unlike the PcG, which are dedicated to a shared set of targets, the trxG act on a wide range of different genes; there is much less overlap in the genes that are regulated by each of the trxG members.

It has often been assumed that the PcG and trxG are mutually exclusive. However, several genetic experiments have hinted at the possibility that some trxG proteins are also involved in Polycomb repression (Gildea et al., 2000; Hagstrom et al., 1997; LaJeunesse and Shearn, 1996; Wu et al., 1989). For example, larvae mutant for the PcG gene *Enhancer of Zeste* show reduced expression of homeotic genes in some modified backgrounds (LaJeunesse and Shearn, 1996). But because the trxG members have broad pleiotropic

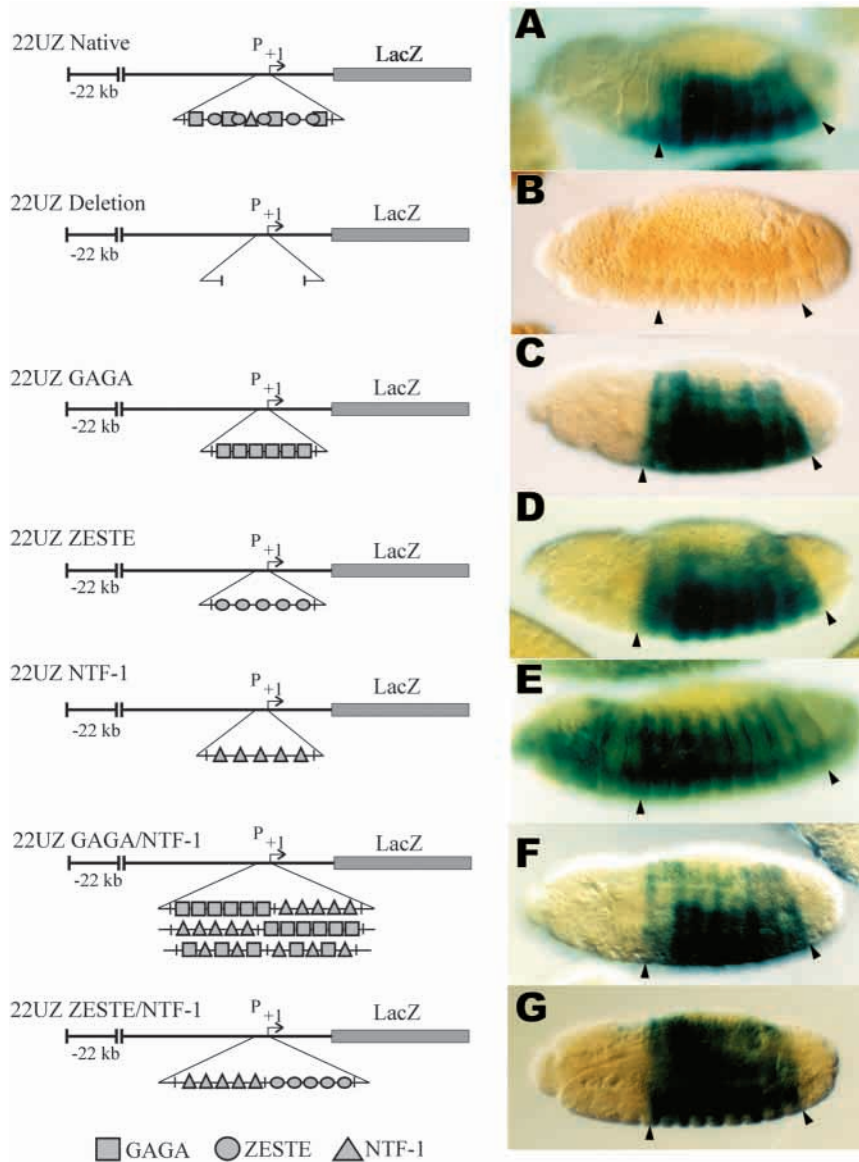

**Fig. 1.** Transgenic analysis of *Ubx* proximal promoter mutations. Cartoons of promoter constructs tested are on the left and indicate the mRNA start site at +1 (arrow), the number of factor binding sites present at the proximal promoter (P) of each construct, and the position of the  $\beta$ -galactosidase reporter gene (*lacZ*). Representative pictures of stage 13-14 embryos showing the pattern of  $\beta$ -galactosidase expression from each transgene are to the right. The normal anterior and posterior boundaries of *Ubx* expression are marked with arrowheads. (A) 22UZ Native; (B) 22UZ Deletion; (C) 22UZ GAGA; (D) 22UZ ZESTE; (E) 22UZ NTF-1; (F) 22UZ GAGA/NTF-1; (G) 22UZ ZESTE/NTF-1.

differently exposed, depending on the transcription state, providing a unique tag that the PcG factors could read.

## MATERIALS AND METHODS

### Plasmid constructs

22UZ Zeste, 22UZ GAGA, 22UZ NTF-1 and 22UZ Deletion were prepared by exchanging the wild-type proximal promoter region of 22UZ (Irvine et al., 1991) with that of mutant proximal promoters from constructs U $\beta$  ZESTE, U $\beta$  GAGA, U $\beta$  NTF-1 and U $\beta$   $\Delta$ -200/-31, respectively (Laney and Biggin, 1992). The 22UZ ZESTE/NTF-1 construct was prepared by inserting five Zeste-binding sites at the Asp718 site 3' of the NTF-1 sites in 22UZ NTF-1. Two variants of 22UZ GAGA were prepared similarly that have six GAGA-binding sites inserted in the Asp718 either 3' or 5' of the NTF-1 sites in 22UZ NTF-1. The multimerized binding sites used in the preceding three constructs were Asp718 restriction fragments from the proximal promoters of either 22UZ GAGA or 22UZ ZESTE. A third variant of 22UZ GAGA contains alternating GAGA and NTF-1 binding sites. These sites were introduced as five tandem copies of the

following oligonucleotides cloned into the Asp718 site of 22UZ deletion: GATCCTGGCTCTGTGTTTCGATCTGAACCGGTCC-TGCGGGTAC and GATCGTACCCGCAGGACCGGTTCAA-GATCGAAACAGAGAGCCAG. All three variants of 22UZ GAGA give essentially the same pattern of *lacZ* expression, indicating that the precise position and orientation of binding sites is not important.

### *Drosophila* strains and P-element-mediated transformation

Germline transformation, analysis of expression patterns, and crosses into  $z^{v77h}$  and  $z^{ae(bx)}$  mutant embryos were performed as described previously (Laney and Biggin, 1992; Spradling, 1986; Patel, 1994), except that the host microinjection stock was  $w^{1118}$ , and chromosomal linkage of inserts was determined by crosses with the balancer fly,  $w/Y; CyO; MKRS/ap^{Xa}$ . Four to 13 homozygous independent transgenic fly lines for each *Ubx-lacZ* fusion construct were obtained: six for 22UZ GAGA, 11 for 22UZ Deletion, 13 for 22UZ ZESTE, four for 22UZ NTF-1, four for 22UZ ZESTE/NTF-1 and six for 22UZ GAGA/NTF-1. All lines for a given construct give essentially the same pattern of expression.

To analyze 22UZ GAGA transgene expression in  $Pc^3$  embryos, flies

effects, it could not be ruled out that the regulation seen in these experiments was indirect and that the PcG and *trxG* are therefore distinct.

We show that the *trxG* proteins Zeste and GAGA play a direct role in maintaining repression of the homeotic gene *Ultrabithorax* (*Ubx*). Based on these data and on previous results demonstrating that Zeste binds to a promoter regardless of its activation state, we propose a new model for the establishment of Polycomb repression in the early embryo. We suggest that the selective recruitment of the PcG to their targets requires proteins that function in both transcriptional activation and repression in the following manner. On inactive promoters in the early embryo, these dual activity proteins are bound to the DNA but are not sequestered in a regulatory complex with other activators. In cells where the promoters are transcribed before gastrulation, however, we propose that these factors make protein/protein interactions with an activation complex. Thus, surfaces on the dual activity factors would be

homozygous for a 22UZ GAGA transgene located in the second chromosome were crossed to *w*; *st in ri Pc<sup>3</sup> pp/TM3, Sb Ser* to produce *w/w*; 22UZ GAGA; *Pc<sup>3</sup>* flies. These were then self crossed to generate *w/w*; 22UZ GAGA; *Pc<sup>3</sup>/Pc<sup>3</sup>* embryos. To analyze expression of 22UZ Zeste transgenes, a 22UZ Zeste transgene inserted on the third chromosome was recombined with *Pc<sup>3</sup>*. The resulting *w/w*; 22UZ Zeste *Pc<sup>3</sup>/TM3* flies were crossed to produce *w/w*; 22UZ Zeste *Pc<sup>3</sup>/22UZ Zeste Pc<sup>3</sup>* embryos.

## RESULTS AND DISCUSSION

Previous transgenic experiments have indicated that Zeste, GAGA and a third transcription factor, NTF-1, activate promoter constructs of the *Ubx* gene in embryos via an intermingled cluster of sites between nucleotides -200 to -31 (Biggin and Tjian, 1988; Laney and Biggin, 1992). The constructs used in these experiments, however, contain only a small subset of the *Ubx cis* regulatory region, and while they reproduce many features of *Ubx* expression, they do not respond to Polycomb repression when inserted at many chromosomal locations. Consequently, they have not permitted a rigorous analysis of the role of the proximal promoter factors in maintaining repression. To address this question, we have used larger constructs that contain the 22 kb of DNA upstream of the *Ubx* mRNA start site. These constructs, first employed by Irvine et al. (Irvine et al., 1991), do not suffer from significant position effect variation; more closely approximate the expression pattern of the endogenous *Ubx* gene than the shorter constructs; maintain efficient repression in late embryos as shown by the lack of  $\beta$ -galactosidase reporter gene expression in more anterior and posterior regions (Fig. 1A, 22UZ Native); and, as demonstrated later, are genetically under the control of PcG genes.

Deletion of nucleotides -200 to -31 essentially abolishes transcription from the large *Ubx* promoter constructs (Fig. 1B, 22UZ Deletion), indicating a crucial role for factors binding to the proximal promoter. To determine the role of each factor separately, three constructs were prepared, each containing binding sites for either Zeste, GAGA or NTF-1 inserted between the deletion end points of the above construct (Fig. 1C-E). Importantly, biochemical, *in vivo* u.v. crosslinking, and genetic experiments strongly suggest that the DNA-binding sites used in these constructs are recognized only by their cognate factor, and not by any other sequence-specific DNA-binding activities (Biggin and Tjian, 1988; Laney and Biggin, 1992; Laney and Biggin, 1996). Binding sites for each factor separately activate transcription of the large constructs during late embryogenesis (Fig. 1, compare B with C, and D with E). Strikingly, constructs containing only GAGA- or Zeste-binding sites at the proximal promoter

are not expressed in the anterior or posterior of the embryo, whereas constructs bearing only NTF-1 sites are strongly transcribed in these terminal regions.

As ectopic expression of *Ubx* in anterior and posterior regions is generally caused by a failure of the initiating repressors or the Polycomb maintenance system (Chan et al., 1994; Simon et al., 1993; Zhang and Bienz, 1992). One interpretation of the above result is that Zeste and GAGA are required for at least one form of repression, while NTF-1 is not. It is also possible, however, that Zeste and GAGA are not repressors. Instead, it may be that they are unable to activate expression in anterior or posterior regions, even though they are expressed at similar levels throughout the embryo (Bhat et al., 1996; Pirrotta et al., 1988). To distinguish between these two possibilities, we first examined constructs that contained either Zeste and NTF-1 sites or GAGA and NTF-1 sites. These constructs are expressed in the central region of the embryo; but, importantly, they are not significantly expressed in anterior or posterior regions (Figs 1, 2) (M.-W. Hur, unpublished). As NTF-1 can activate *Ubx* transcription in these terminal regions (Fig. 1E), the absence of terminal expression

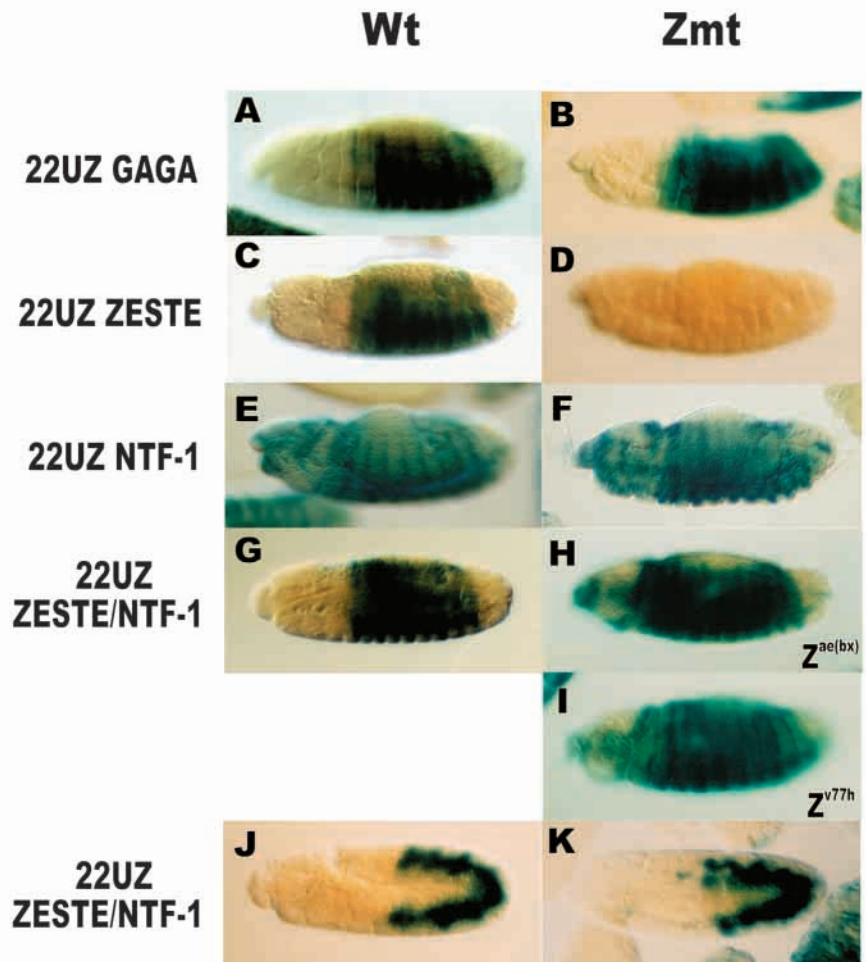

**Fig. 2.** Comparison of transgene expression in wild type and *zeste* mutant embryos. (A,B) 22UZ GAGA. (C,D) 22UZ ZESTE. (E,F) 22UZ NTF-1. (G-K) 22UZ ZESTE/NTF-1. Expression in wild-type embryos is shown on the left (Wt). Expression in *zeste* mutant embryos is shown on the right (Zmt). Essentially identical results were observed in *z<sup>ae(bx)</sup>* and *z<sup>v77h</sup>* embryos for all constructs (H,I and M.-W. Hur, unpublished). All embryos are stage 13-14, except J and K, which are stage 11.

**Fig. 3.** Derepression of 22UZ Zeste and 22UZ GAGA transgenes in *Pc<sup>3</sup>* mutant embryos. (A,B) 22UZ GAGA. (C,D) 22UZ Zeste. Expression in wild-type embryos is shown on the left (Wt). Expression in *Pc<sup>3</sup>* embryos is shown on the right (Pc3). The arrowheads mark the anterior and posterior boundaries of *Ubx* expression in wild-type embryos. The increased expression to the left of the anterior arrowhead in *Pc<sup>3</sup>* homozygous embryos shows the derepression of the transgenes. All embryos were stained for the same length of time.

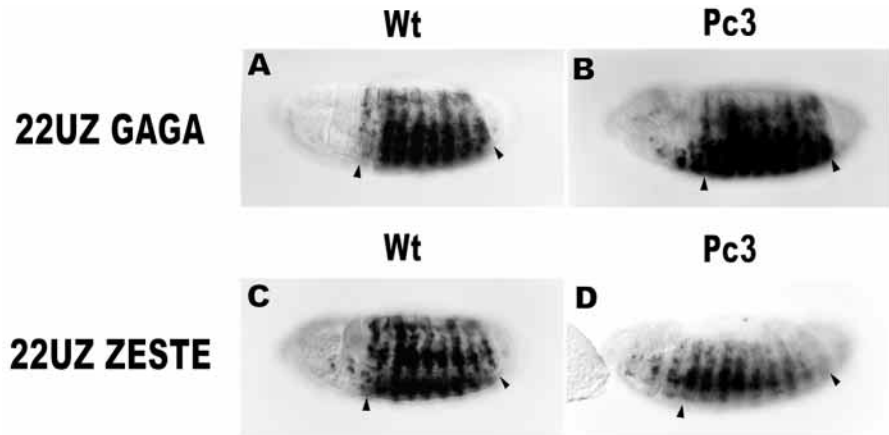

is consistent with GAGA and Zeste directly repressing transcription in addition to their activation function.

To establish decisively if Zeste and GAGA are repressors, we wanted to use a genetic test. Unfortunately, GAGA is lethal gene and a broadly acting regulator required for expression of transcription factors that regulate *Ubx* in early embryos (Bhat et al., 1996; Farkas et al., 1994). Thus, it has not been possible to determine genetically whether GAGA is a direct repressor of *Ubx*. By contrast, *zeste* is a largely redundant gene. *zeste* null embryos and flies are essentially wild type, and the endogenous *Ubx* gene is expressed normally in these animals; but because the 22UZ transgenes lack the *cis* regulatory elements through which factors that redundantly share the function of *zeste* act, these transgenes should be regulated by *zeste* (Goldberg et al., 1989; Laney and Biggin, 1996).

Consistent with this idea, transgenes containing only Zeste sites at the proximal promoter fail to express in *zeste* mutant embryos, whereas constructs containing only GAGA or NTF-1 binding sites are expressed in this same genetic background (Fig. 2A,B,E,F). Thus, this genetic experiment confirms that Zeste bound at the proximal promoter is required to activate transcription of the 22UZ constructs in the normal domain of *Ubx* expression. To test the role of Zeste in repression, constructs containing binding sites for both Zeste and NTF-1 at the proximal promoter were compared in wild type and *zeste* mutant embryos. In the normal domain of *Ubx* expression, these constructs are expressed at similar levels in mutant and wild-type embryos. Importantly, these constructs are derepressed in anterior and posterior regions of embryos lacking *zeste* (Fig. 2G-L). Thus, Zeste actively represses transcription in terminal regions of the embryo via binding sites at the proximal promoter.

The embryos shown in Fig. 1 and Fig. 2A-I are at late stages of development, well after the Polycomb maintenance system has become active. To distinguish if Zeste is required for the initiation or the maintenance of repression, we examined expression of the 22UZ ZESTE/NTF-1 construct at an earlier stage. As Fig. 2K shows, in embryos that lack *zeste*, the 22UZ ZESTE/NTF-1 transgene is almost fully repressed in anterior and posterior regions at this earlier stage. Only weak derepression is observed in a few isolated cells. Thus, the transiently expressed factors that initiate repression in the early embryo must be active, and the extensive derepression observed later must be due to a failure in the maintenance system.

The PcG genes are an essential part of system that maintains repression of the endogenous *Ubx* gene. To confirm that these genes also act on our transgenes, the 22UZ Zeste and 22UZ GAGA constructs were crossed into PcG mutant embryos. Fig. 3 shows that both transgenes are derepressed in late stage embryos lacking the *Polycomb* gene. Similar results were obtained in embryos lacking another PcG gene, *extra sex combs* (M.-W. Hur, unpublished). Thus, Zeste – and probably also GAGA – act together with the Polycomb system to maintain repression of *Ubx*.

We suspect that GAGA and Zeste have redundant, overlapping functions in maintaining repression because the 22UZ Native construct, which contains Zeste, GAGA and NTF-1 sites, is not derepressed in *zeste* mutant embryos (Laney and Biggin, 1996), which contrasts with the behavior of the 22UZ ZESTE/NTF-1 construct. Such redundancy in repression would parallel the known redundancy between these two transcription factors in activating *Ubx* in the central portions of the animal (Laney and Biggin, 1996), and helps explain the previous lack of evidence that Zeste and GAGA are repressors.

The data presented in this paper are consistent with the earlier genetic data that suggested that some trxG and PcG proteins may have dual activities (Gildea et al., 2000; Hagstrom et al., 1997; LaJeunesse and Shearn, 1996; Wu et al., 1989). Further support for this idea comes from recent biochemical experiments that have shown that GAGA is complexed with two PcG proteins in *Drosophila* nuclear extracts (Horad et al., 2000) and Zeste is part of a multisubunit complex that contains Polycomb (Saurin et al., 2001). In addition, PcG proteins are frequently associated in vivo with promoter regions that include Zeste or GAGA DNA recognition sites, including the *Ubx* proximal promoter examined in this paper (Orlando et al., 1998). Most PcG proteins do not recognize specific DNA sequences; thus, the interaction with Zeste and GAGA may serve to recruit PcG proteins to promoters.

But is it essential that some proteins, such as Zeste and GAGA, participate in both repression and activation, or is it mere coincidence? We suggest that it may be essential. At the transition between the initiating repressors and the Polycomb system, one possibility is it that Polycomb proteins are recruited to or activated on only those genes that are bound by initiating repressors; the initiating repressors may physically bind to PcG proteins to recruit them. However, Poux et al. have

shown that Polycomb repression can be established on *Ubx* promoter constructs that lack initiating repressors elements, provided that initiating enhancer elements are also absent (Poux et al., 1996). In other words, at the transition between the establishment and maintenance of the *Ubx* expression pattern, the Polycomb system reads the absence of activation, rather than the presence of repression or repressors.

Endogenous Zeste protein binds to *Ubx* promoter constructs in vivo whether they are transcribed or not (Laney and Biggin, 1997). We suggest that in the early embryo in the cells in which *Ubx* is activated, Zeste is complexed, directly or indirectly, with initiating activators on the *Ubx* promoter. These complexes mask surfaces on Zeste that would otherwise be bound by components of the Polycomb system. By contrast, in those cells where *Ubx* is not activated, Zeste is still bound to the promoter but is not part of an activating complex. Surfaces on Zeste protein would then be exposed and could serve as the signal that the Polycomb system reads to initiate the maintenance phase of repression. The dual activities of Zeste and GAGA could be a key to understanding this fascinating regulatory mechanism.

We are grateful to Ken Irvine for providing the plasmid 22UZ. This research was supported by a Korea Research Foundation Genetic Engineering Research grant (96-98) and a Life Phenomena & Function Research grant (2000) both awarded to M.-W. H. and by a NIH research grant awarded to M. D. B. Work at the Lawrence Berkeley National Laboratory is performed under Department of Energy Contract DE-AC03-76SF00098, University of California.

## REFERENCES

- Bhat, K. M., Farkas, G., Karch, F., Gyurkovics, H., Gausz, J. and Schedl, P. (1996). The GAGA factor is required in the early Drosophila embryo not only for transcriptional regulation but also for nuclear division. *Development* **122**, 1113-1124.
- Bienz, M. and Muller, J. (1995). Transcriptional silencing of homeotic genes in Drosophila. *BioEssays* **17**, 775-784.
- Biggin, M. D. and Tjian, R. (1988). Transcription factors that activate the Ultrabithorax promoter in developmentally staged extracts. *Cell* **53**, 699-711.
- Cavalli, G. and Paro, R. (1999). Epigenetic inheritance of active chromatin after removal of the main transactivator. *Science* **286**, 955-958.
- Chan, C. S., Rastelli, L. and Pirrotta, V. (1994). A Polycomb response element in the *Ubx* gene that determines an epigenetically inherited state of repression. *EMBO J.* **13**, 2553-2564.
- Farkas, G., Gausz, J., Galloni, M., Reuter, G., Gyurkovics, H. and Karch, F. (1994). The Trithorax-like gene encodes the Drosophila GAGA factor. *Nature* **371**, 806-808.
- Gildea, J. J., Lopez, R. and Shearn, A. (2000). A screen for new trithorax group genes identified little imaginal discs, the Drosophila melanogaster homologue of human retinoblastoma binding protein 2. *Genetics* **156**, 645-663.
- Goldberg, M. L., Colvin, R. A. and Mellin, A. F. (1989). The Drosophila zeste locus is nonessential. *Genetics* **123**, 145-155.
- Hagstrom, K., Muller, M. and Schedl, P. (1997). A Polycomb and GAGA dependent silencer adjoins the Fab-7 boundary in the Drosophila bithorax complex. *Genetics* **146**, 1365-1380.
- Hashimoto, N., Brock, H. W., Nomura, M., Kyba, M., Hodgson, J., Fujita, Y., Takihara, Y., Shimada, K. and Higashinakagawa, T. (1998). RAE28, BM11, and M33 are members of heterogeneous multimeric mammalian Polycomb group complexes. *Biochem. Biophys. Res. Commun.* **245**, 356-365.
- Horad, B., Tatout, C., Poux, S. and Pirrotta, V. (2000). Structure of a polycomb response element and in vitro binding of polycomb group complexes containing GAGA factor. *Mol. Cell. Biol.* **20**, 3187-3197.
- Irvine, K. D., Helfand, S. L. and Hogness, D. S. (1991). The large upstream control region of the Drosophila homeotic gene Ultrabithorax. *Development* **111**, 407-424.
- Kennison, J. A. (1995). The Polycomb and trithorax group proteins of Drosophila: trans-regulators of homeotic gene function. *Annu. Rev. Genet.* **29**, 289-303.
- LaJeunesse, D. and Shearn, A. (1996). E(z): a polycomb group gene or a trithorax group gene? *Development* **122**, 2189-2197.
- Laney, J. D. and Biggin, M. D. (1992). zeste, a nonessential gene, potently activates Ultrabithorax transcription in the Drosophila embryo. *Genes Dev.* **6**, 1531-1541.
- Laney, J. D. and Biggin, M. D. (1996). Redundant control of Ultrabithorax by zeste involves functional levels of zeste protein binding at the Ultrabithorax promoter. *Development* **122**, 2303-2311.
- Laney, J. D. and Biggin, M. D. (1997). Zeste-mediated activation by an enhancer is independent of cooperative DNA binding in vivo. *Proc. Natl. Acad. Sci. USA* **94**, 3602-3604.
- Orlando, V., Jane, E. P., Chinwalla, V., Harte, P. J. and Paro, R. (1998). Binding of Trithorax and Polycomb proteins to the bithorax complex: dynamic changes during early Drosophila embryogenesis. *EMBO J.* **17**, 5141-5150.
- Patel, N. H. (1994). Imaging neuronal subsets and other cell types in whole-mount *Drosophila* embryos and larvae using antibody probes. In *Drosophila melanogaster: Practical Uses in Cell and Molecular Biology* (ed. L. S. B. Goldstein and E. A. Friberg), pp. 445-487. San Diego, CA: Academic Press.
- Pirrotta, V. (1998). Polycomb the genome: PcG, trxG and chromatin silencing. *Cell* **93**, 333-336.
- Pirrotta, V., Bickel, S. and Mariani, C. (1988). Developmental expression of the Drosophila zeste gene and localization of zeste protein on polytene chromosomes. *Genes Dev.* **2**, 1839-1850.
- Poux, S., Kostic, C. and Pirrotta, V. (1996). Hunchback-independent silencing of late *Ubx* enhancers by a Polycomb Group Response Element. *EMBO J.* **15**, 4713-4722.
- Saurin, A. J., Shao, Z., Erdjument-Bromage, H., Tempst, P. and Kingston, R. E. (2001). A Drosophila Polycomb complex includes Zeste and dTAFII proteins. *Nature* **412**, 655-660.
- Simon, J., Chiang, A., Bender, W., Shimell, M. J. and O'Connor, M. (1993). Elements of the Drosophila bithorax complex that mediate repression by Polycomb group products. *Dev. Biol.* **158**, 131-144.
- Sinclair, D. A., Milne, T. A., Hodgson, J. W., Shellard, J., Salinas, C. A., Kyba, M., Randazzo, F. and Brock, H. W. (1998). The Additional sex combs gene of Drosophila encodes a chromatin protein that binds to shared and unique Polycomb group sites on polytene chromosomes. *Development* **125**, 1207-1216.
- Spradling, A. C. (1986). P element-mediated transformation. In *Drosophila: A Practical Approach* (ed. D. B. Roberts), pp. 175-197. Washington, DC: IRL Press.
- Strouboulis, J., Damjanovski, S., Vermaak, D., Meric, F. and Wolffe, A. P. (1999). Transcriptional repression by XPC1, a new polycomb homolog in *Xenopus laevis* embryos, is independent of histone deacetylase. *Mol. Cell. Biol.* **19**, 3958-3968.
- Strutt, H. and Paro, R. (1997). The polycomb protein complex of Drosophila melanogaster has different compositions at different target genes. *Mol. Cell. Biol.* **17**, 6773-6783.
- Tillib, S., Petruk, S., Sedkov, Y., Kuzin, A., Fujioka, M., Goto, T. and Mazo, A. (1999). Trithorax and Polycomb-Group response elements within an Ultrabithorax transcription maintenance unit consist of closely situated but separable sequences. *Mol. Cell. Biol.* **19**, 5189-5202.
- Wu, C. T., Jones, R. S., Lasko, P. F. and Gelbart, W. M. (1989). Homeosis and the interaction of zeste and white in Drosophila. *Mol. Gen. Genet.* **218**, 559-564.
- Zhang, C. C. and Bienz, M. (1992). Segmental determination in Drosophila conferred by hunchback (hb), a repressor of the homeotic gene Ultrabithorax (*Ubx*). *Proc. Natl. Acad. Sci. USA* **89**, 7511-7515.
